# Supplementary material
Source: publisher figshare collection journal article supplement (https://aacr.figshare.com/articles/dataset/_/22930494)

# Figure S6

## A

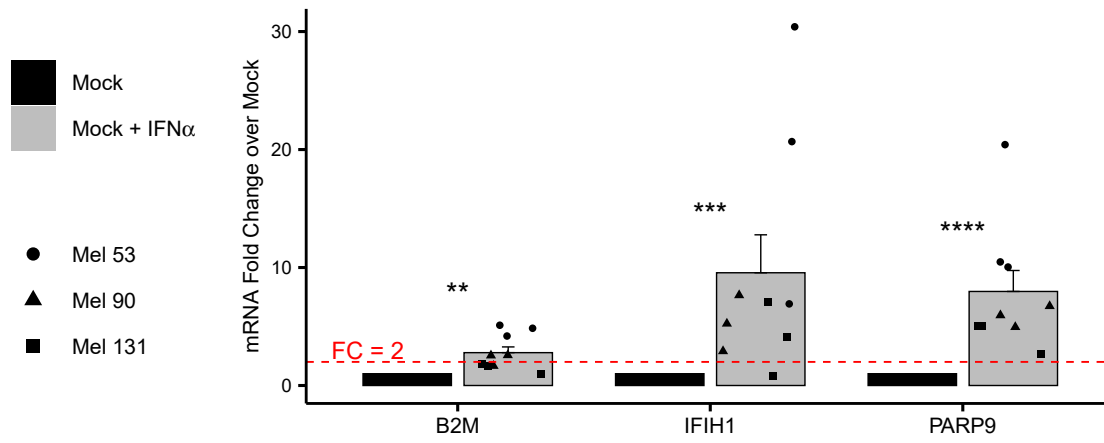

## B

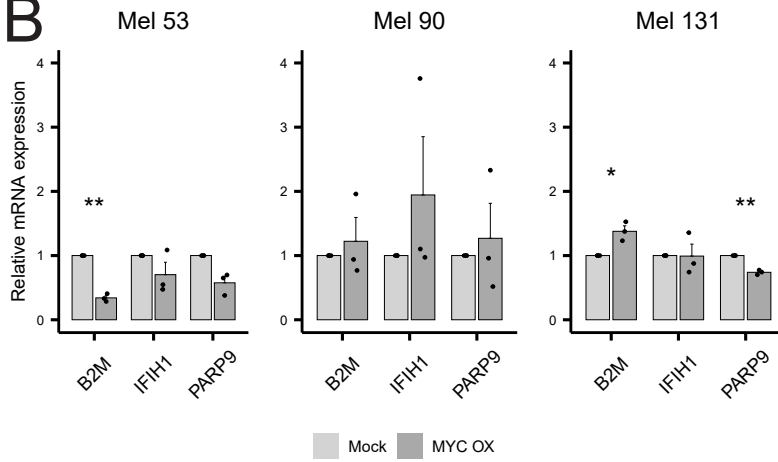

## C

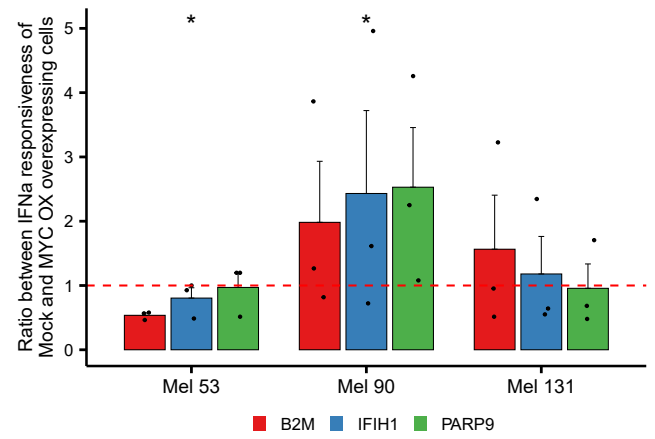

Supplement: Supplementary file 1 [file 40665075]
